# Supplementary material for: Manipulation of sterol homeostasis for the production of 24-epi-ergosterol in industrial yeast
Source: PubMed Central journal article supplement (PMC9883489; doi:10.1038/s41467-023-36007-z), 2023-01-27
Supplement: 41467_2023_36007_MOESM1_ESM.pdf [file 41467_2023_36007_MOESM1_ESM.pdf]

**Manipulation of sterol homeostasis for the production of 24-epi-  
ergosterol in industrial yeast**

Jiang *et al.*

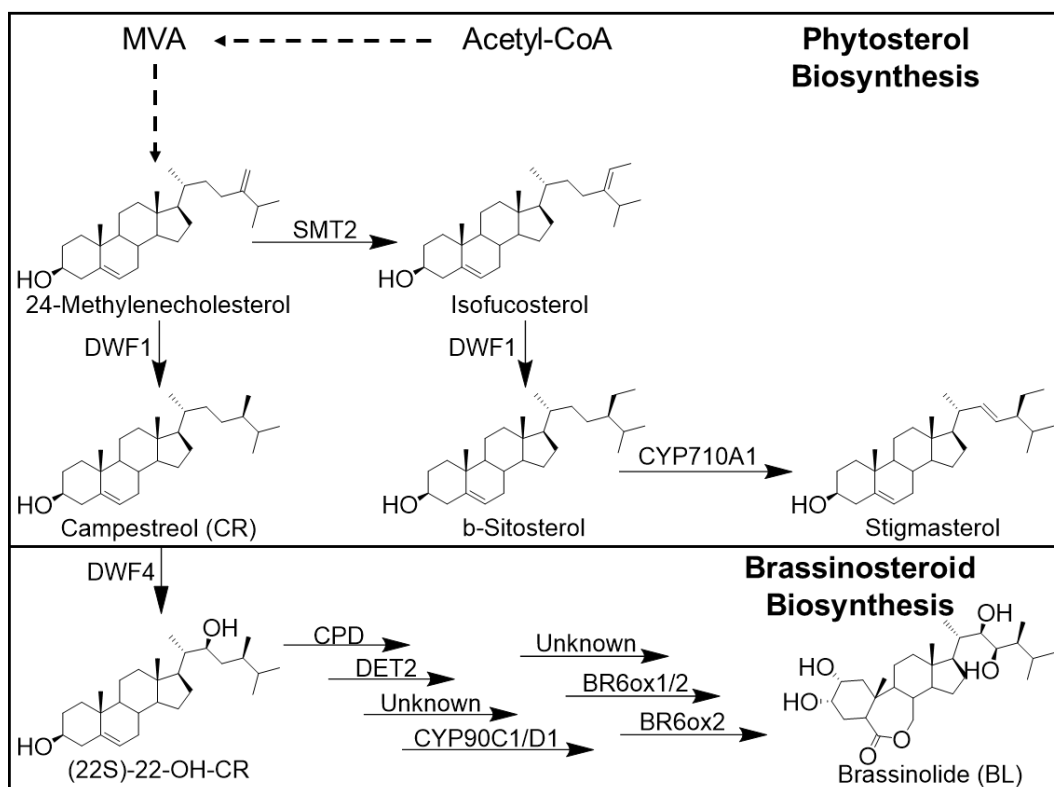

**Supplementary Fig. 1. A simplified BL biosynthetic pathway from acetyl-CoA.** In plants, 24-methylenecholesterol and isofucosterol are catalyzed by DWF1 to synthesize campesterol and  $\beta$ -sitosterol, respectively. BL is proposed to be biologically synthesized from campesterol with 8 enzymatic reactions<sup>1</sup>. Unfortunately, several of the BL biosynthetic pathway enzymes have not been identified yet.

*AtDWF1* MS D L Q T P L V R P K R K K T W V D Y F V K F R W I I V I F I V L P F S A T F Y F L I Y L G D M W S E S K S F E K R Q 60  
*BrDWF1* MS D L Q A P L V R P K R K K T W V D Y F V K F R W I I V I F V V L P I S A T L Y F L I Y L G D M W S E S K S Y E K R R 60  
*ArDWF1* MS D L E V P - L R P K R K K I W V D Y F V Q F R W I I V I F L V L P I S F T L Y F L T Y L G D V R S E S K S F K Q R Q 59  
*CsDWF1* MS D L E A P - L R P K R K K I W V D Y F V Q F R W I I V I F I V L P I S C T L Y F L T Y L G D V K S E R K S Y K Q R Q 59

*AtDWF1* K E H D E N V K K V I K R L K R D A S K D G L V C T A R K P W I A V G M R N V D Y K R A R H F E V D L G E F R N I L E 120  
*BrDWF1* K E H D Q N V A K V I K R L K E R D A A K D G L V C T A R K P W I A V G M R N V D Y K R A R H F E V D L G E F R N I L E 120  
*ArDWF1* R E H D E N V E K V V K R L K E R N P K K D G L V C T A R K P W I S V G M R N V D Y K R A R H F E V D L S A F R N V L D 119  
*CsDWF1* K E H D E N V Q K V K R L K Q R N P S K D G L V C T A R K P W I A V G M R N V D Y K R A R H F E V D L S A F R N V L E 119

*AtDWF1* I N K E K M T A R V E P L V N M G Q I S R A T V P M N L S L A V V A E L D D L T V G G L I N G Y G I E G S S H I Y G L F 180  
*BrDWF1* I N K E K M I A R V E P L V N M G Q I S R A T V P M N L S L A V V A E L D D L T V G G L I N G Y G I E G S S H L Y G L F 180  
*ArDWF1* I D K E R M I A R V E P L V N M G Q I S R V T V P M N L S L A V V A E L D D L T V G G L I N G Y G I E G S S H L Y G L F 179  
*CsDWF1* I D R D R M I A K V E P L V N M G Q I S R V T V P M N L S L A V V A E L D D L T V G G L I N G Y G I E G S S H I Y G L F 179

*AtDWF1* A D T V E A Y E I V L A G G E L V R A T R D N E Y S D L F Y A I P W S Q G T L G L L V A A E I R L I K V K E Y M R L T Y 240  
*BrDWF1* A D T V V A Y E I V L A G G E L V R A T K D N E Y S D L F Y A I P W S Q G T L G L L V A A E I K L I P V K E Y M K L T Y 240  
*ArDWF1* S D T V S Y E I V L A D G R L V R A T K D N Q Y S D L F Y A I P W S Q G T L G L L V A A E V K L I P V K E Y M K V T Y 239  
*CsDWF1* S D T V V A Y E I V L A D G S V R A T K D N E Y S D L F Y A I P W S Q G T L G L L V S A E I K L I P I K E Y M K L T Y 239

*AtDWF1* I P V K G D L Q A L A Q G Y I D S F A P K D G D K - - - S K I P D F V E G M V Y N P T E G V M M V G T Y A S K E E A K K 297  
*BrDWF1* I P V K G D L Q T L A Q G Y M D S F A P K D G D T - - - S K I P D F V E G M V Y N P T E G V M M V G T Y A S K E E A K K 297  
*ArDWF1* K P I V G N L K L A Q G Y I D S F A P R D G D Q D N P E K V P D F V E T M I Y S P T E G V C M T G R Y A S K E E A K K 299  
*CsDWF1* K P V I G N I Q D L A Q G Y V D S F A P R D G D Q D N P D K V P D F V E T M I Y S P T E G V C M T G V Y A S K E E A K K 299

*AtDWF1* K G N K I N N V G W W F K P W F Y Q H A Q T A L K K G E F V E Y I P T R E Y Y H R H T R C L Y W E G K L I L P F G D Q F 357  
*BrDWF1* K G N K I N N V G W W F K P W F Y Q H A Q T A L K K G E F V E Y I P T R E Y Y H R H T R C L Y W E G K L I L P F G D Q F 357  
*ArDWF1* K G N K I N S V G W W F K P W F Y Q H A Q T A L K K G E F V E Y I P T R D Y Y H R H T R S L Y W E G L I L P F A D Q W 359  
*CsDWF1* K G N V I N N V G W W F K P W F Y Q H A Q K A L K K G E F V E Y I P T R E Y Y H R H T R C L Y W E G K L I L P F G D Q W 359

*AtDWF1* W F R Y L G W L M P P K V S L L K A T Q G E A I R N Y Y H D M H V I Q D M L V P L Y K V G D A L E W V H R E M E V Y P 417  
*BrDWF1* W F R L F G W L M P P K V S L L K A T Q G E A I R N Y Y H D M H V I Q D M L V P L Y K V G D A L E W V H R E M E V Y P 417  
*ArDWF1* W F R F L G W L M P P K V S L L K A T Q G E A I R N Y Y H E M H V I Q D M L V P L Y K V G D A L E F V H R E M E L Y P 419  
*CsDWF1* W F R F L F G W L M P P K V S L L K A T Q G E A I R N Y Y H E M H V I Q D M L V P L Y K V G D A L E W V D R E M E V Y P 419

*AtDWF1* I W L C P H K L F K Q P I K G Q I Y P E P G F E Y E N R Q G D T E D A Q M Y T D V G V Y Y A P G C V L R G E E F D G S E 477  
*BrDWF1* I W L C P H K L Y K A P I K Q Q I Y P E P G F E Y E R R Q G D T E D A Q M Y T D V G V Y Y A P G P V L R G E E F D G S E 477  
*ArDWF1* V W L C P H R L F K L P V K P M I S P E P G F E L Q R R Q G D T H Y A Q M Y T D I L L C Y A P G P V L R G E Q F D G A E 479  
*CsDWF1* I W L C P H R L Y K L P M K T M V Y P E P G F E L H R R Q G D T Q Y A Q M Y T D V G V Y Y S P G P V L R G E V F D G I E 479

*AtDWF1* A V R R M E K W L I E N H G F Q P Q Y A V S E L D E K S F W R M F N G E L Y E E C R K K Y R A I G T F M S V Y Y K S K K 537  
*BrDWF1* A V R K M E K W L I E N G G F Q P Q Y A V S E L D E K S F W R M F D G D L Y E H C R K K Y R A V G T F M S V Y Y K S K K 537  
*ArDWF1* A V H R M E N W L I E N H G Y E P Q Y T V S E L S E K N F W R M F D G G L Y E Q C R R K Y G A V G T F M S V Y Y K S K K 539  
*CsDWF1* A V R R M E K W L I E N H G F Q P Q Y A V S E L D E K N F W R M F D A G L Y E H C R R K Y G A V G T F M S V Y Y K S K K 539

*AtDWF1* G R K T E K E V R E A E Q A H L E T A Y A E A D 561  
*BrDWF1* G R K T E K E V R E A E Q A H L E T A Y A E A D 561  
*ArDWF1* G R K T E K E V Q E A E Q A I L E S P D A E V A 563  
*CsDWF1* G R K T E K E V Q E A E Q A Q L D T A Y A E V D 563

**Supplementary Fig. 2. Alignment of the amino acid sequences of DWF1 orthologues.** *DWF1* genes from *Arabidopsis thaliana* (*AtDWF1*)(Q39085.2)<sup>2</sup>, *Ajuga reptans* (*ArDWF1*)(BAS68578.1)<sup>3</sup>, *Brassica rapa* (*BrDWF1*)(VDC72099.1), and *Cannabis sativa* (*CsDWF1*)(XP\_030508560.1) were codon-optimized for yeast expression and chemically synthesized. The sequences of *BrDWF1* and *CsDWF1* were obtained by PSI-BLAST based on *AtDWF1* and *ArDWF1*.

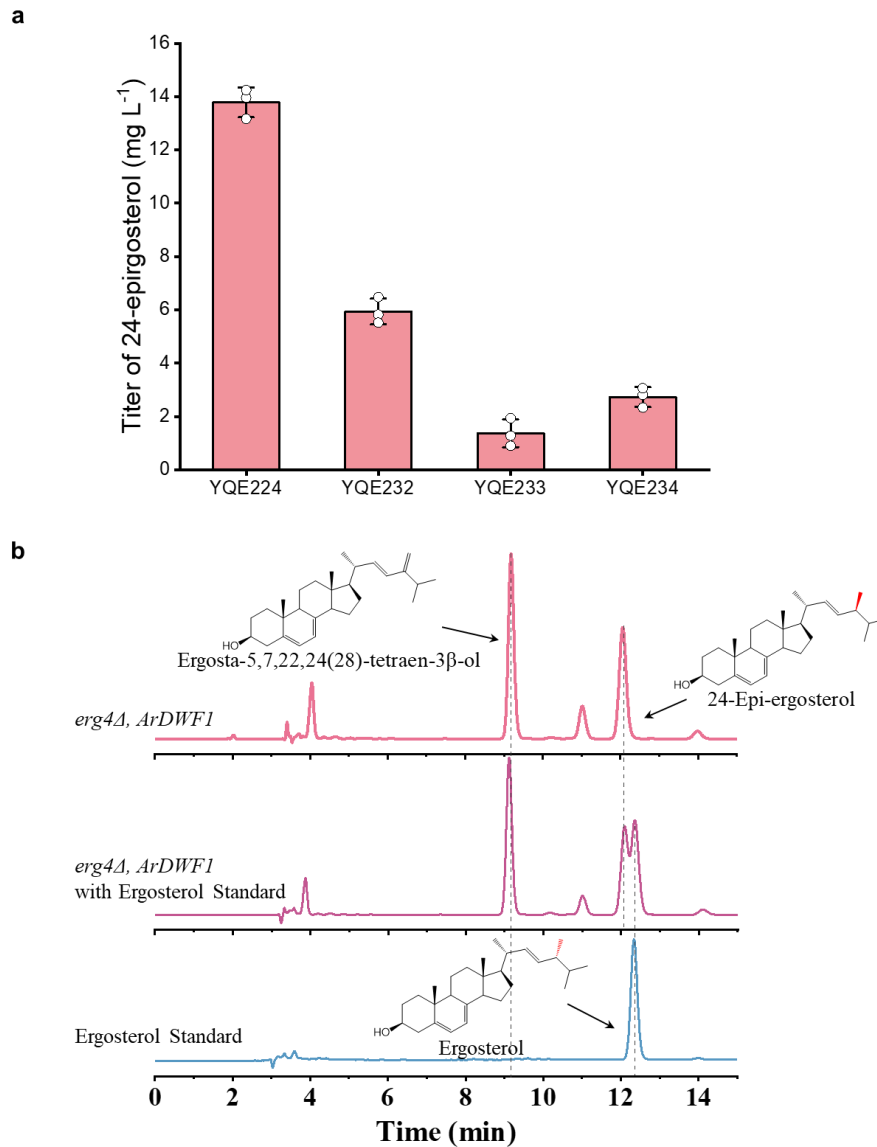

**Supplementary Fig. 3. De novo biosynthesis of 24-epi-ergosterol in engineered yeast strains.** **a** The expression cassettes of *ArDWF1* (YQE224), *AtDWF1* (YQE232), *BrDWF1* (YQE233), and *CsDWF1* (YQE234) were integrated into the genome of YQE102 to evaluate their performance for 24-epi-ergosterol production. **b** HPLC analysis for ergosterol standard, *erg4Δ*-*ArDWF1* strain with ergosterol standard and *erg4Δ*-*ArDWF1* strain respectively. **a** Data are presented as mean values  $\pm$  SD from three independent biological replicates (n=3), the circles represent individual data points. Source data are provided as a Source Data file.

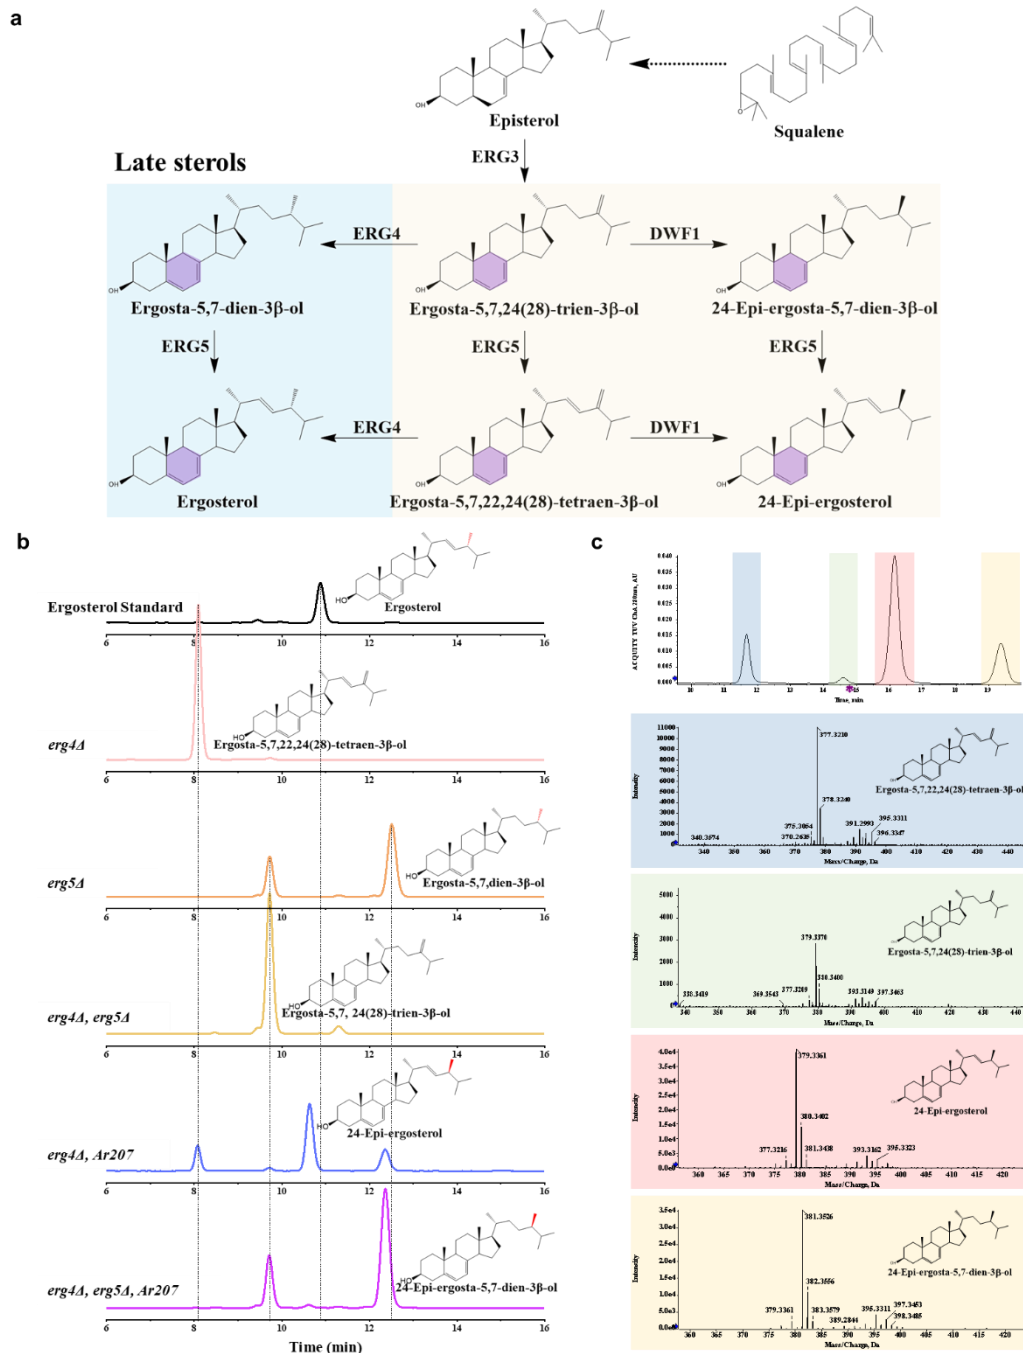

**Supplementary Fig. 4. LCMS analysis of 24-epi-ergosterol and its biosynthetic precursors. a** Late sterol biosynthetic pathway including ERG4, ERG5, and DWF1. **b** HPLC profiles for ergosterol standard, *erg4Δ* strain (producing ergosta-5,7,22,24(28)-tetraen-3β-ol), *erg5Δ* strain (producing ergosta-5,7-dien-3β-ol), *erg4Δ-erg5Δ* strain (producing ergosta-5,7,24(28)-trien-3β-ol), *erg4Δ-Ar207* strain (producing 24-epi-ergosterol), and *erg4Δ-erg5Δ-Ar207* strain (producing 24-epi-ergosta-5,7-dien-3β-ol). **c** MS verification of the HPLC peaks as ergosta-5,7,22,24(28)-tetraen-3β-ol, ergosta-5,7,24(28)-trien-3β-ol, 24-epi-ergosterol, and 24-epi-ergosta-5,7-dien-3β-ol, respectively. Source data are provided as a Source Data file.

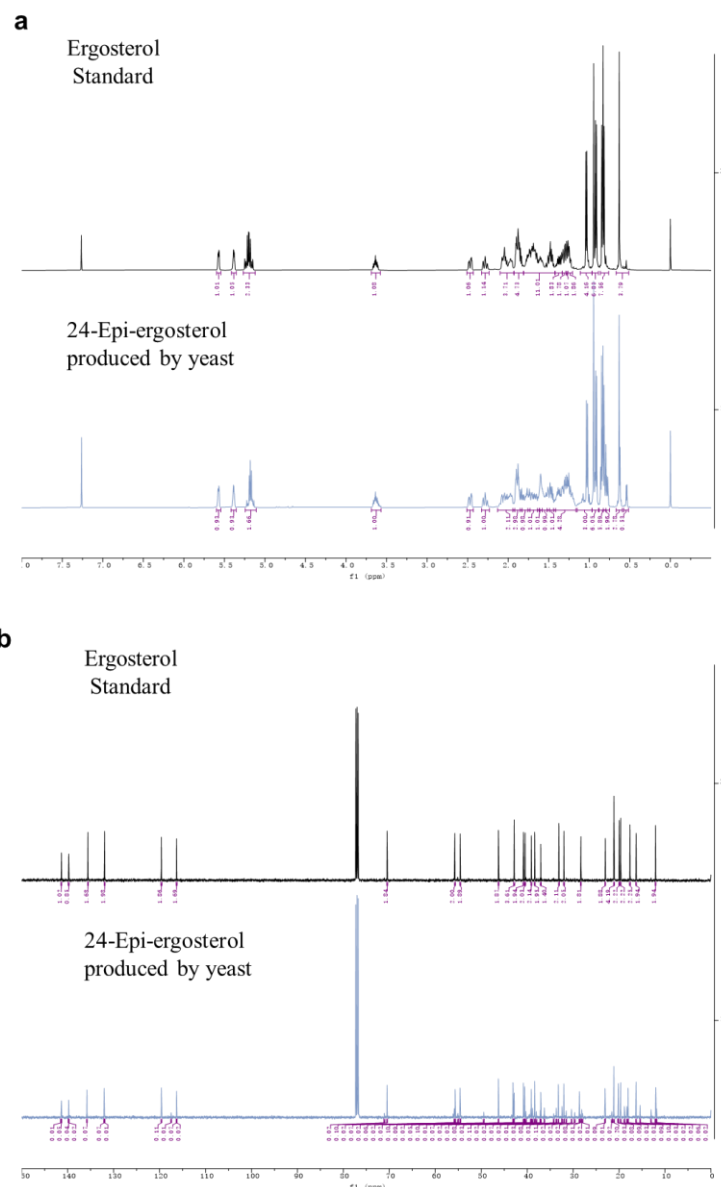

**Supplementary Fig. 5. NMR profiles of ergosterol standard and 24-epi-ergosterol.**

**a**  $^1\text{H}$  NMR spectroscopy. 24-Epi-ergosterol (500 MHz,  $\text{CDCl}_3$ )  $\delta$  5.57 (dd, 1H), 5.38 (dt, 1H), 5.24-5.11 (m, 2H), 3.63 (tq, 1H), 2.47 (ddd, 1H), 2.28 (ddd, 1H), 2.13-1.92 (m, 2H), 1.88 (dddd, 3H), 1.85-1.73 (m, 1H), 1.76-1.62 (m, 1H), 1.61 (dd, 1H), 1.61-1.49 (m, 1H), 1.52-1.42 (m, 1H), 1.44-1.17 (m, 4H), 1.15-0.97 (m, 3H), 0.96-0.89 (m, 6H), 0.88-0.80 (m, 6H), 0.79 (td, 2H), 0.63 (d, 3H), 0.54 (d, 1H). **b**  $^{13}\text{C}$  NMR spectroscopy. 24-Epi-ergosterol (126 MHz,  $\text{CDCl}_3$ )  $\delta$  141.47, 141.37, 139.80, 139.77, 135.82, 132.07, 131.98, 119.60, 117.48, 116.30, 116.27, 71.08, 70.47, 55.86, 55.68, 55.06, 54.59, 54.52, 49.46, 46.25, 43.09, 42.94, 42.83, 40.81, 40.62, 40.56, 40.27, 39.20, 39.10, 38.85, 38.39, 38.00, 37.15, 37.04, 36.26, 34.22, 33.66, 33.23, 32.43, 32.01, 31.49, 30.35, 29.66, 28.61, 28.43, 28.11, 27.97, 23.06, 23.04, 21.56, 21.13, 20.22, 20.18, 19.66, 18.84, 18.28, 18.05, 16.30, 15.40, 13.06, 12.06, 12.02, 11.84. Source data are provided as a Source Data file.

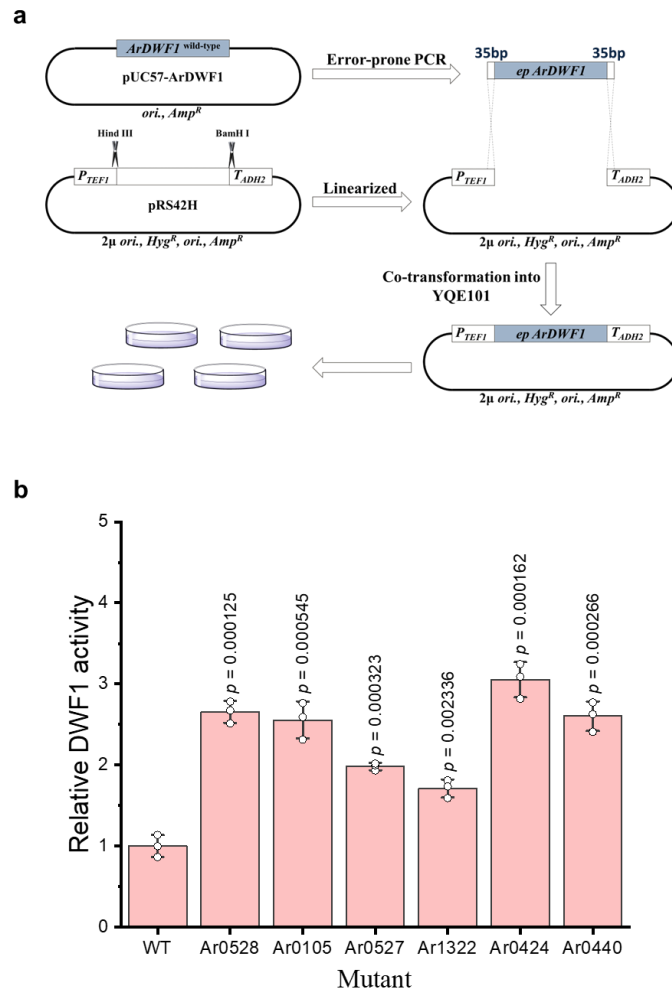

**Supplementary Fig. 6. Directed evolution of ArDWF1 for improved production of 24-epi-ergosterol in engineered yeast strains.** **a** The procedure of library construction using homologous recombination in yeast. pRS42H was linearized by *HindIII* and *BamHI*. The mutant library, with 35 bp homologous arms to pRS42H was generated by error-prone PCR. Co-transformation of mutant fragment and linearized plasmid into YQE101 results in recombination and library construction. **b** Positive mutants obtained from directed evolution. Six mutants with a total of 10 mutations were obtained in the first round of directed evolution. The DWF1 activity was defined as the ratio of HPLC peak areas of 24-epi-ergosterol to ergosta-5,7,22,24(28)-tetraen-3 $\beta$ -ol. **b** Data are presented as mean values  $\pm$  SD from three independent biological replicates ( $n=3$ ), the circles represent individual data points. Significance ( $p$ -value) was evaluated by two-sided  $t$ -test, no significance (n.s.) presents  $p > 0.05$ . Source data are provided as a Source Data file.

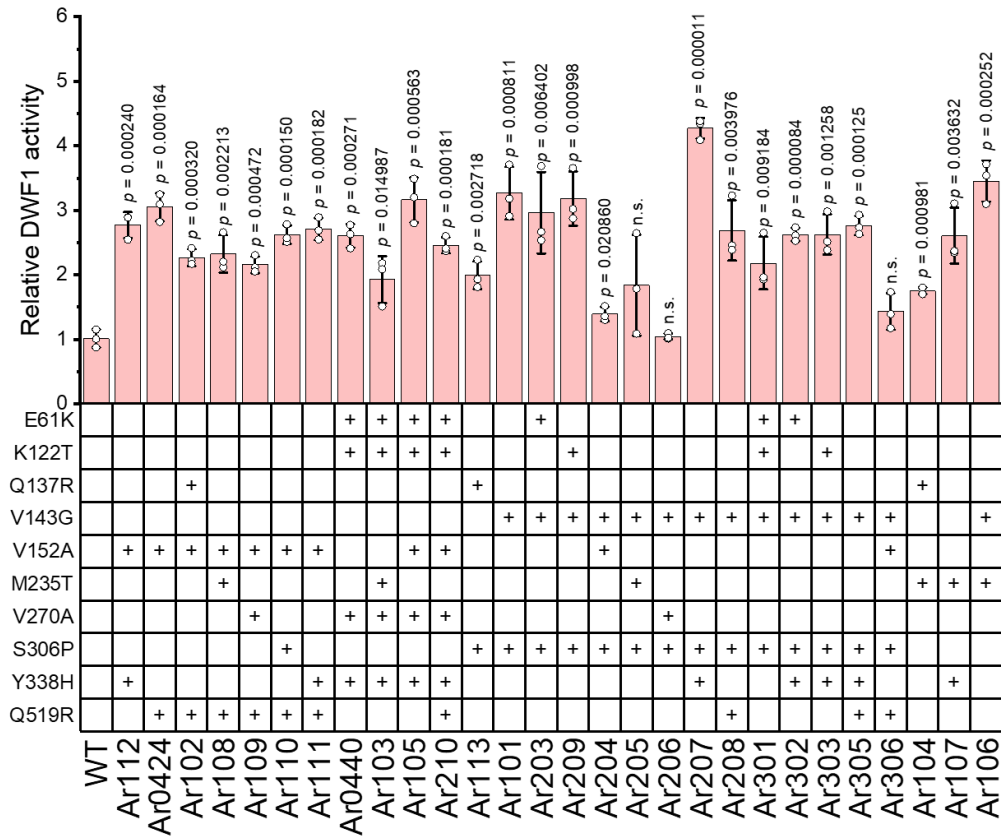

**Supplementary Fig. 7. The activity of DWF1 combinatorial mutants.** The second round of directed evolution via DNA shuffling resulted in the construction of a series of combinatorial mutants, whose activity was evaluated by episomal plasmid transformation into YQE101 (for relative DWF1 activity). Data are presented as mean values  $\pm$  SD from three independent biological replicates ( $n=3$ ), the circles represent individual data points. Significance ( $p$ -value) was evaluated by two-sided  $t$ -test, no significance (n.s.) presents  $p > 0.05$ . Source data are provided as a Source Data file.



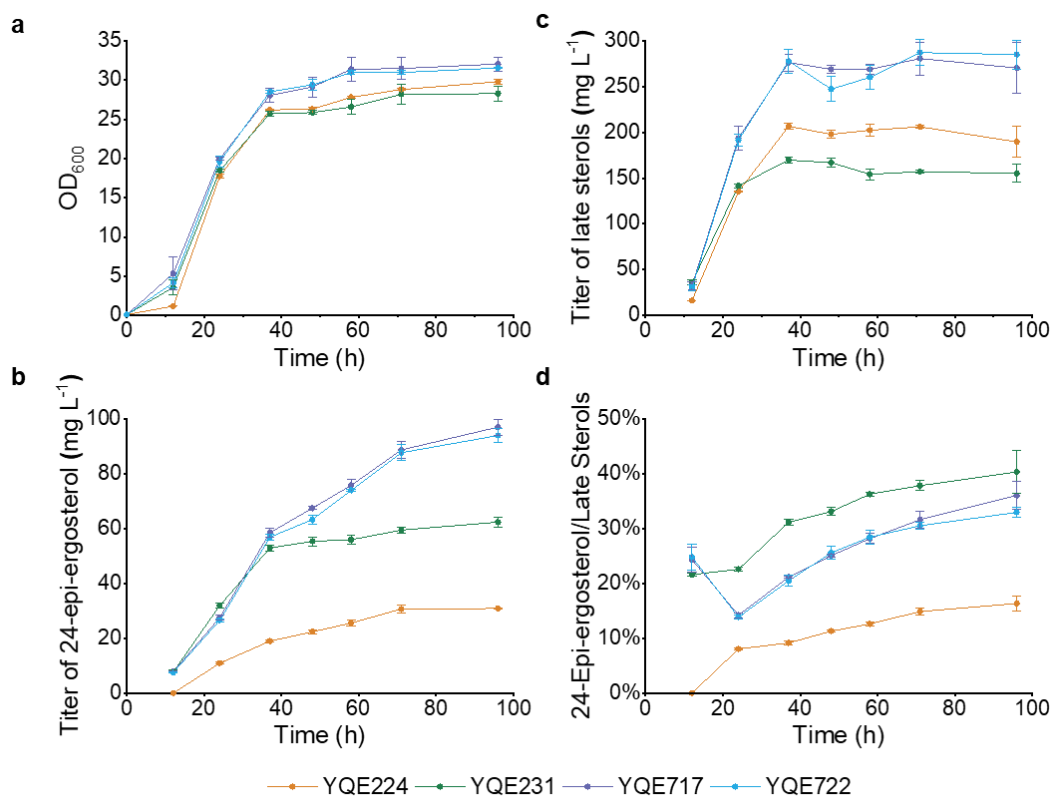

**Supplementary Fig. 8. Fermentation profiles of YQE224, YQE231, YQE717, and YQE722 in shake flasks.** Fermentation of YQE224, YQE231, YQE717, and YQE722 was performed in 250 mL shake flasks with 50 mL YPD medium containing 20 g/L glucose for 96 h, to obtain the time courses of cell growth **a**, titer of 24-epi-ergosterol **b**, titer of late sterols **c**, and the ratio of 24-epi-ergosterol to late sterols **d**. Data are presented as mean values  $\pm$  SD from three independent biological replicates (n=3). Source data are provided as a Source Data file.

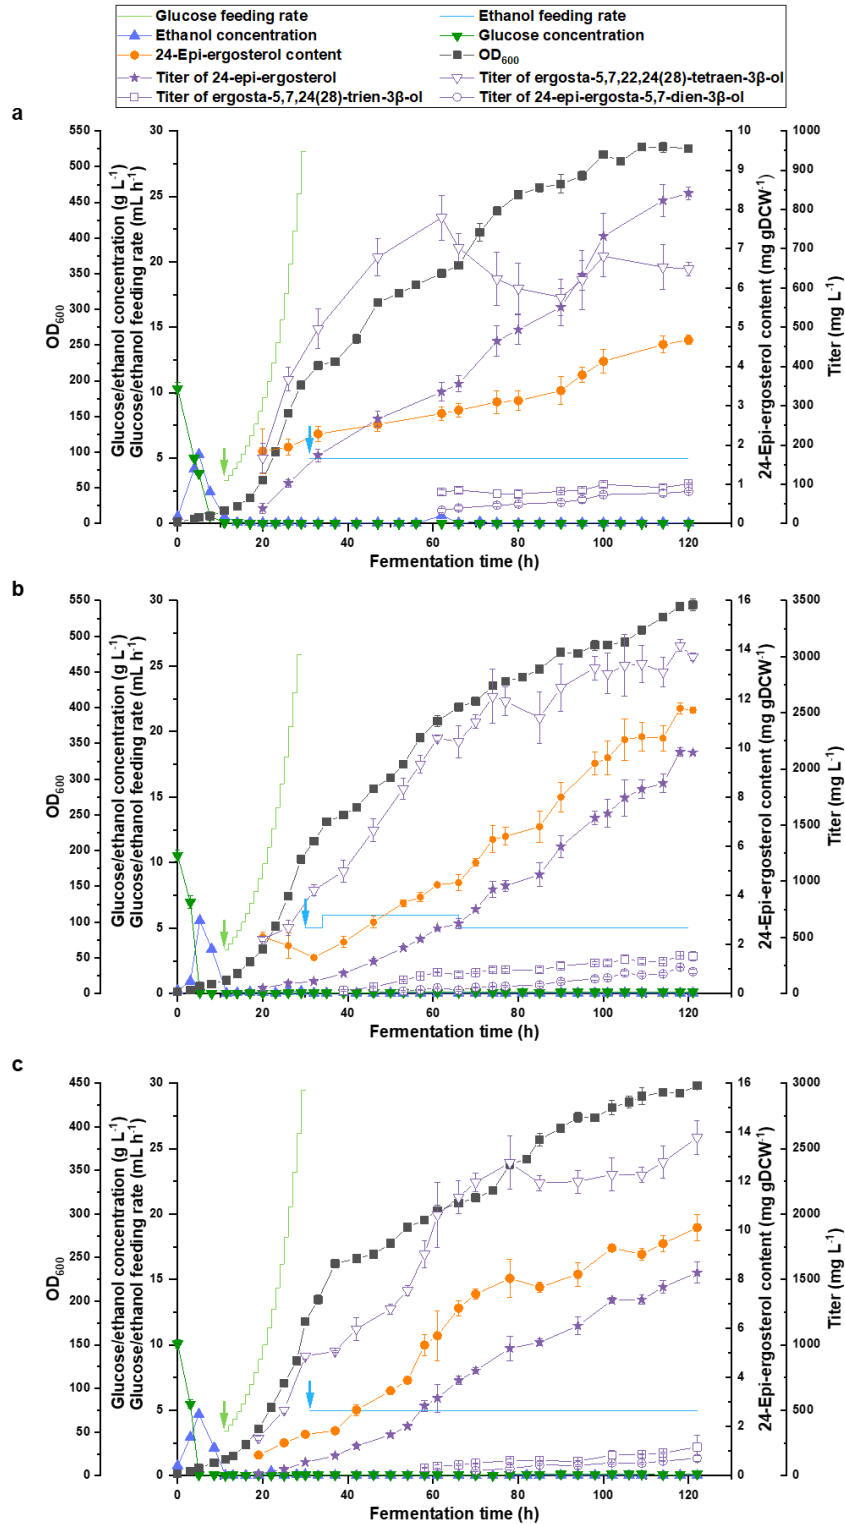

**Supplementary Fig. 9. Fed-batch fermentation for YQE231, YQE717, and YQE722. a YQE231. b YQE717. c YQE722.** The green and blue arrows indicated the start of glucose and ethanol feeding, respectively. Data are presented as mean values  $\pm$  SD from three independent biological replicates (n=3). Source data are provided as a Source Data file.

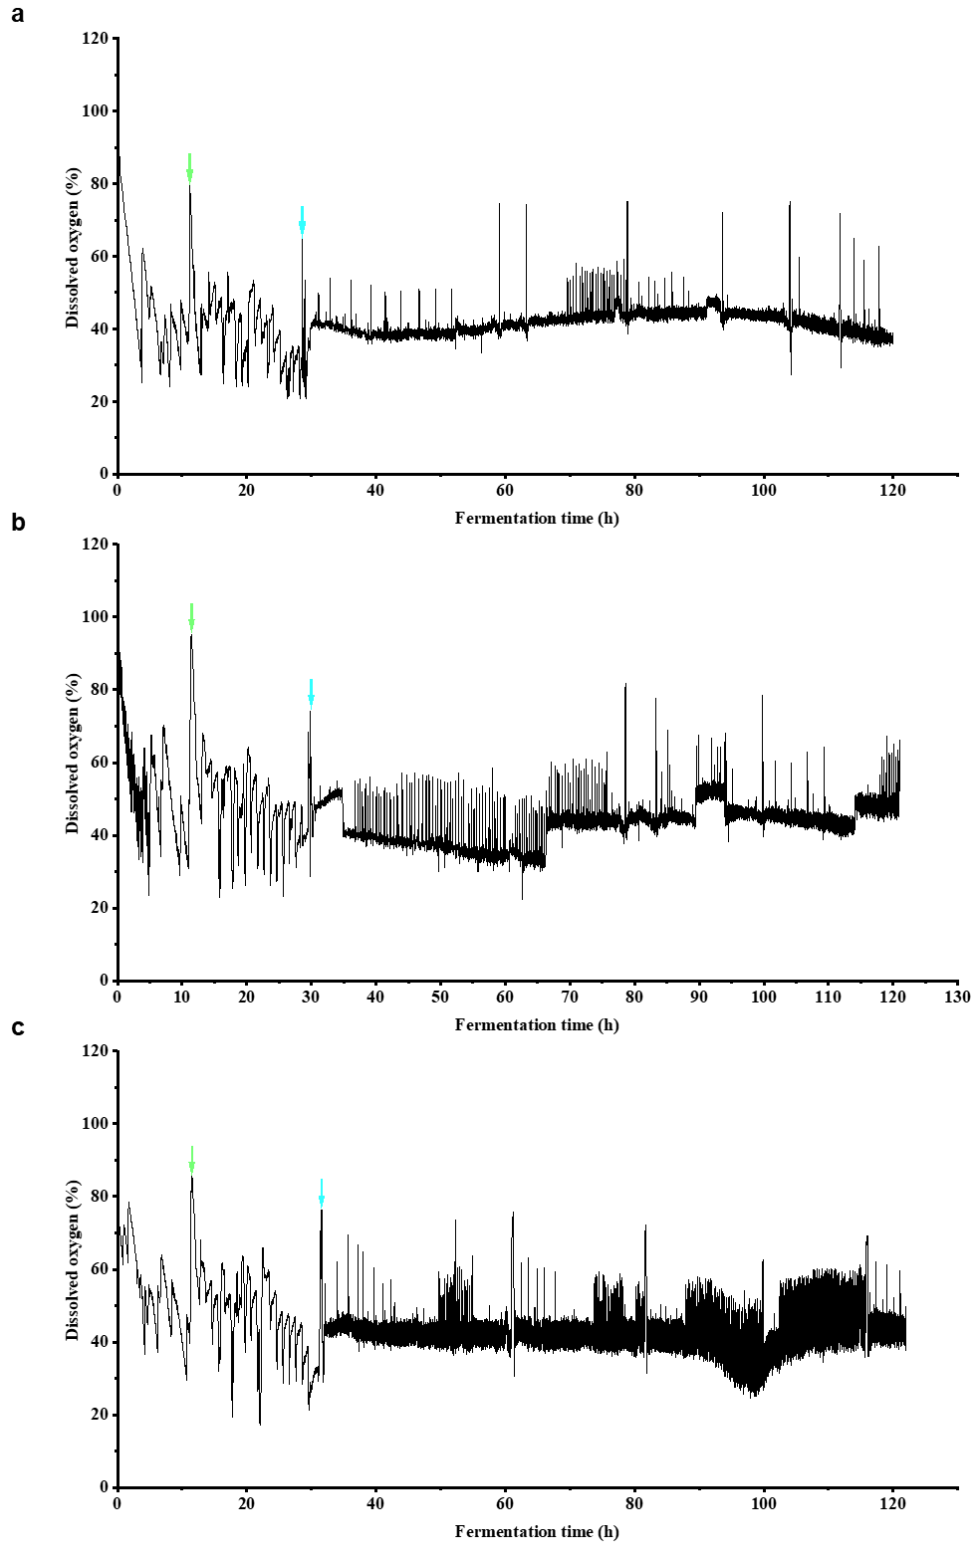

**Supplementary Fig. 10. Dissolved oxygen curves of fed-batch fermentation for YQE231, YQE717, and YQE722. a YQE231. b YQE717. c YQE722.** The green and blue arrows indicated the start of glucose and ethanol feeding, respectively. Source data are provided as a Source Data file.

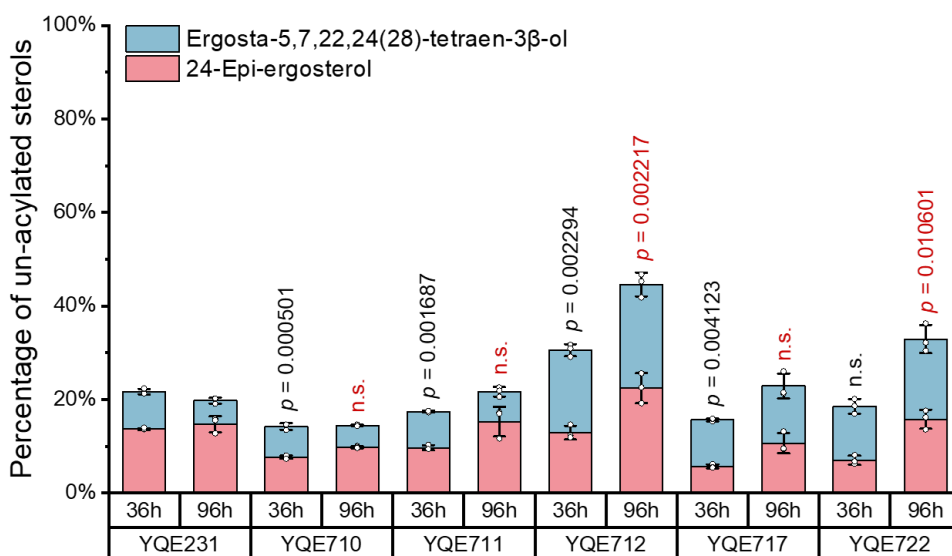

**Supplementary Fig. 11. The percentage of un-acylated sterols in engineered yeast strains.** The un-acylated form of 24-epi-ergosterol and ergosta-5,7,22,24(28)-tetraen-3β-ol were quantified by HPLC. Data are presented as mean values  $\pm$  SD from three independent biological replicates ( $n=3$ ), the circles represent individual data points. The statistical evaluation ( $p$ -value) of the percentage of un-acylated sterols in 36 h (black) and 96 h (red star) were performed by two-sided  $t$ -test separately, no significance (n.s.) presents  $p > 0.05$ . Source data are provided as a Source Data file.

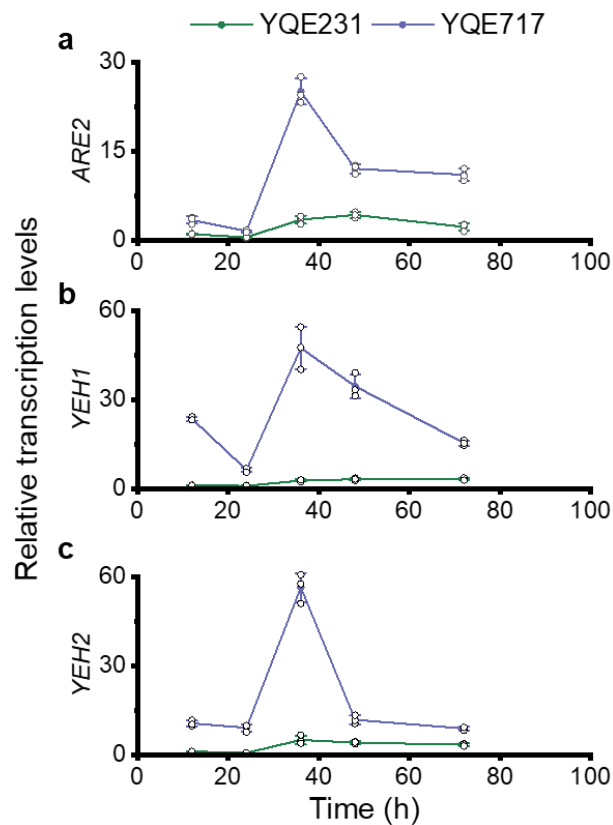

**Supplementary Fig. 12. Relative transcription level of *ARE2*, *YEH1*, *YEH2* in *YQE717* and *YQE231*.** a *ARE2*. b *YEH1*. c *YEH2*. Samples collected at 12 h, 24 h, 36 h, 48 h, and 72 h during fermentation of the two strains in shake flasks were subject to qPCR analysis. The transcription level of *YQE231* for the three genes at 12 h was set to 1. Data are presented as mean values  $\pm$  SD from three independent biological replicates (n=3). Source data are provided as a Source Data file.

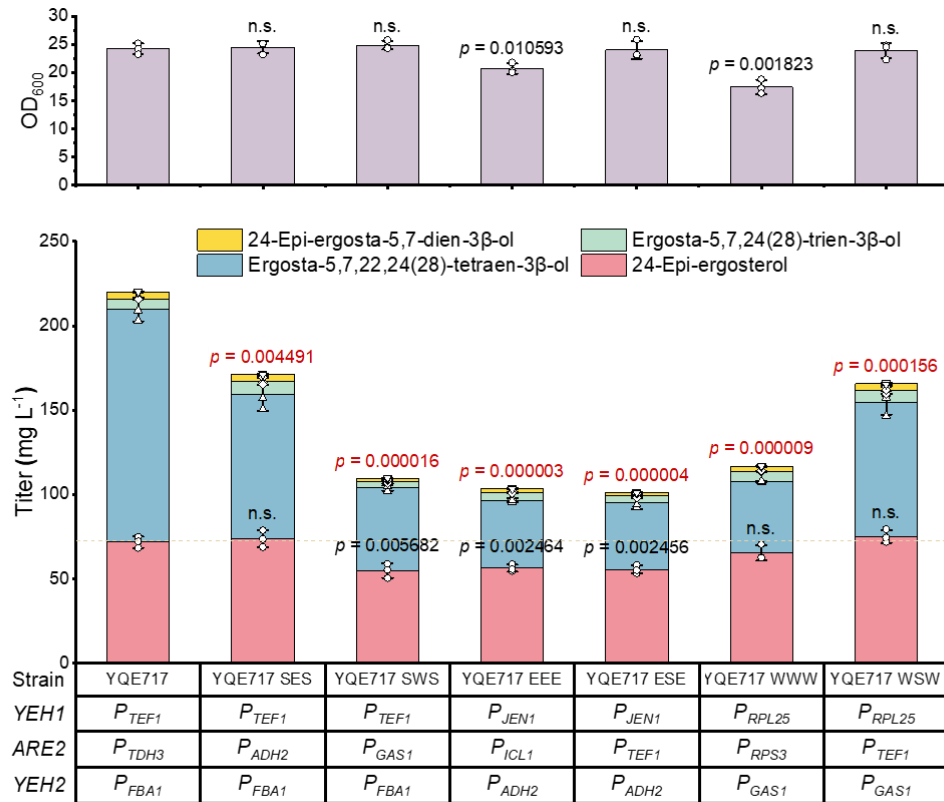

**Supplementary Fig. 13. Quantification of late sterols with different promoter combinations for the expression of *ARE2*, *YEH1*, and *YEH2* in YQE231.** Details on the properties of the selected promoters were provided in Supplementary Table 3. Data are presented as mean values  $\pm$  SD from three independent biological replicates ( $n=3$ ), the circles represent individual data points. Significance ( $p$ -value) of the titer of total late sterols (red) and 24-epi-ergosterol (black) were evaluated by two-sided  $t$ -test, no significance (n.s.) presents  $p > 0.05$ . Source data are provided as a Source Data file.

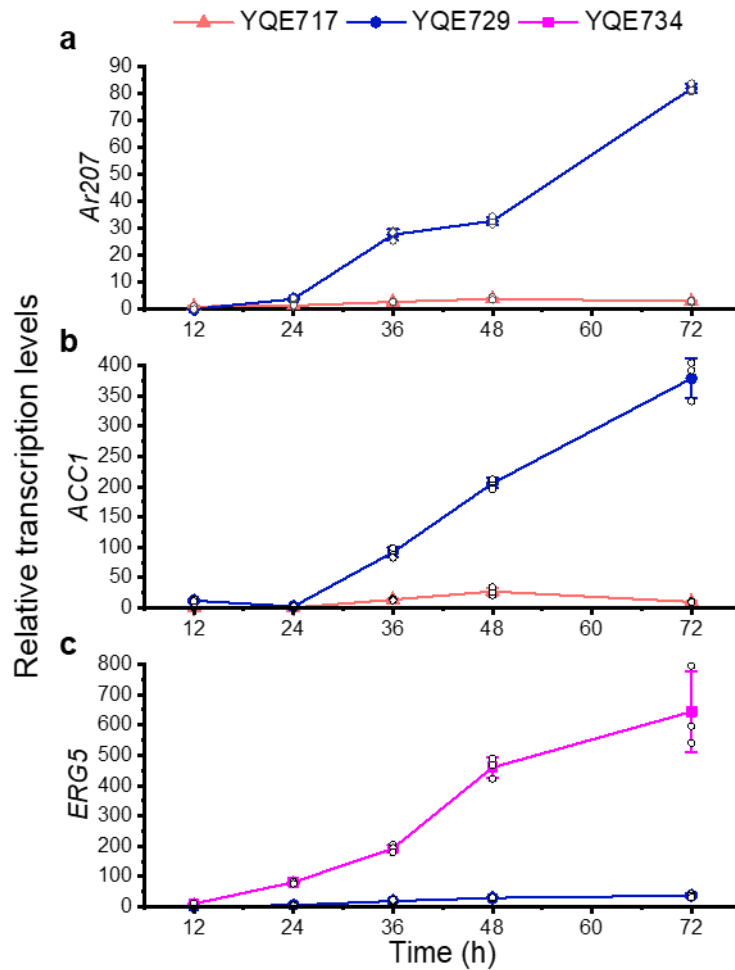

**Supplementary Fig. 14. Relative transcription level of *Ar207*, *ACC1*, and *ERG5* in YQE717, YQE729, and YQE734. a *Ar207*. b *ACC1*. c *ERG5*.** Samples collected at 12 h, 24 h, 36 h, 48 h, and 72 h during the fermentation of these strains in shake flasks were used for qPCR analysis to determine the transcription level. The transcription level of YQE717 for *Ar207* and *ACC1* as well as YQE729 for *ERG5* at 12 h were set to 1. Data are presented as mean values  $\pm$  SD from three independent biological replicates (n=3). Source data are provided as a Source Data file.

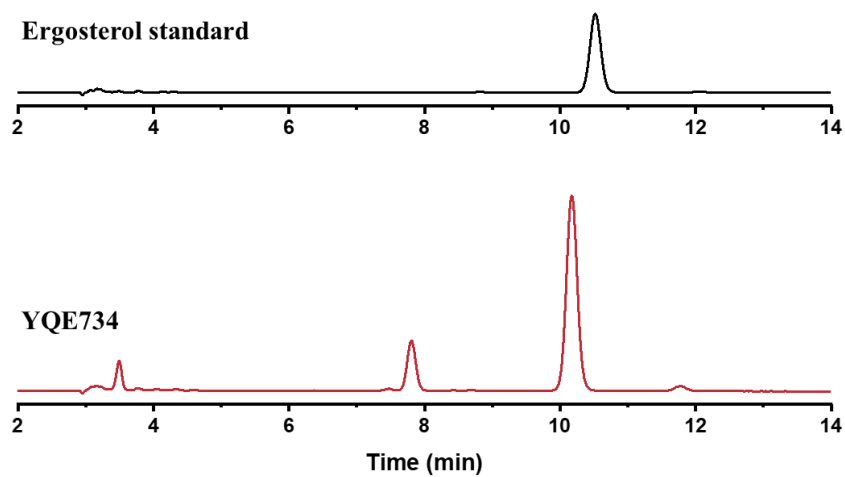

**Supplementary Fig. 15. HPLC profiles for ergosterol standard and YQE734.**  
Source data are provided as a Source Data file.



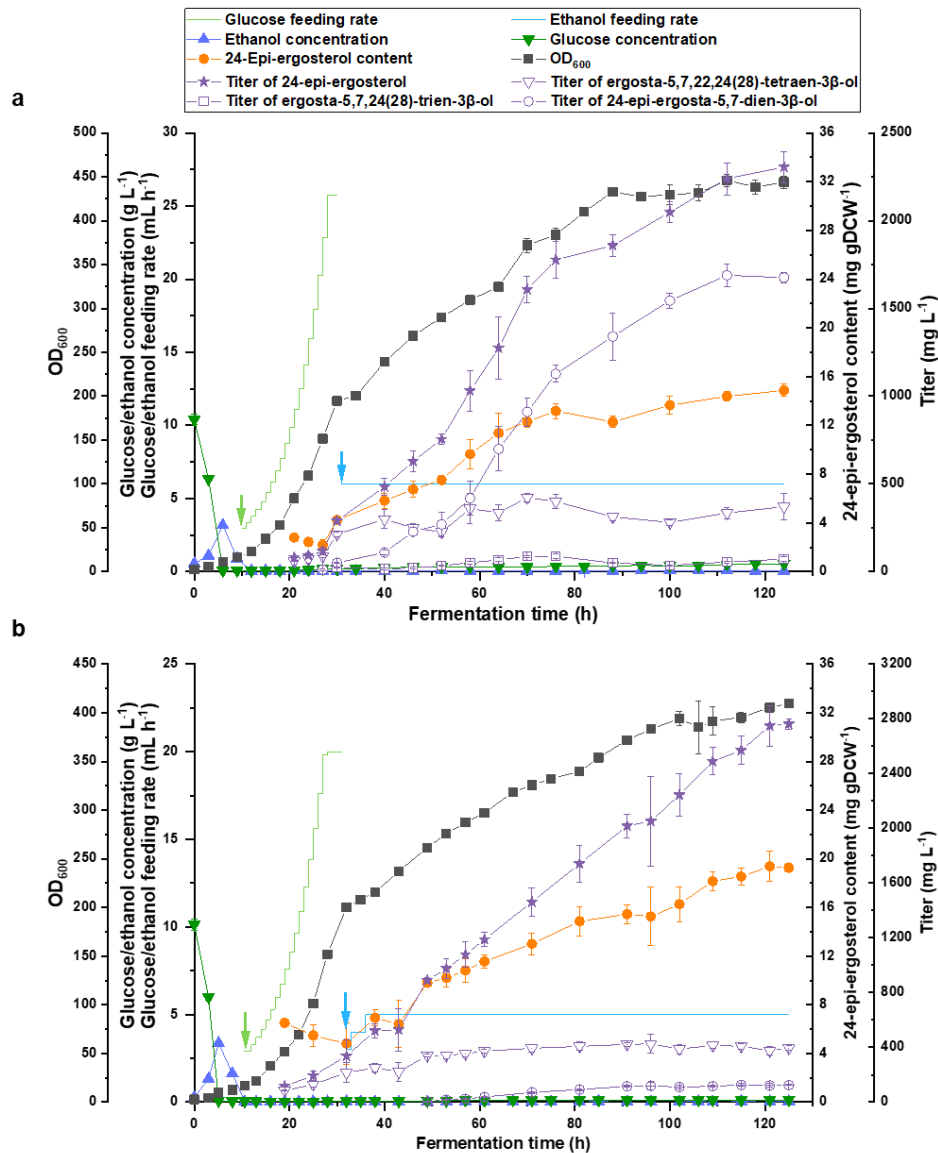

**Supplementary Fig. 16. Fed-batch fermentation for YQE729 and YQE734. a** YQE729. **b** YQE734. The green and blue arrows indicated the start of glucose and ethanol feeding, respectively. Data are presented as mean values  $\pm$  SD from three independent biological replicates ( $n=3$ ). Source data are provided as a Source Data file.

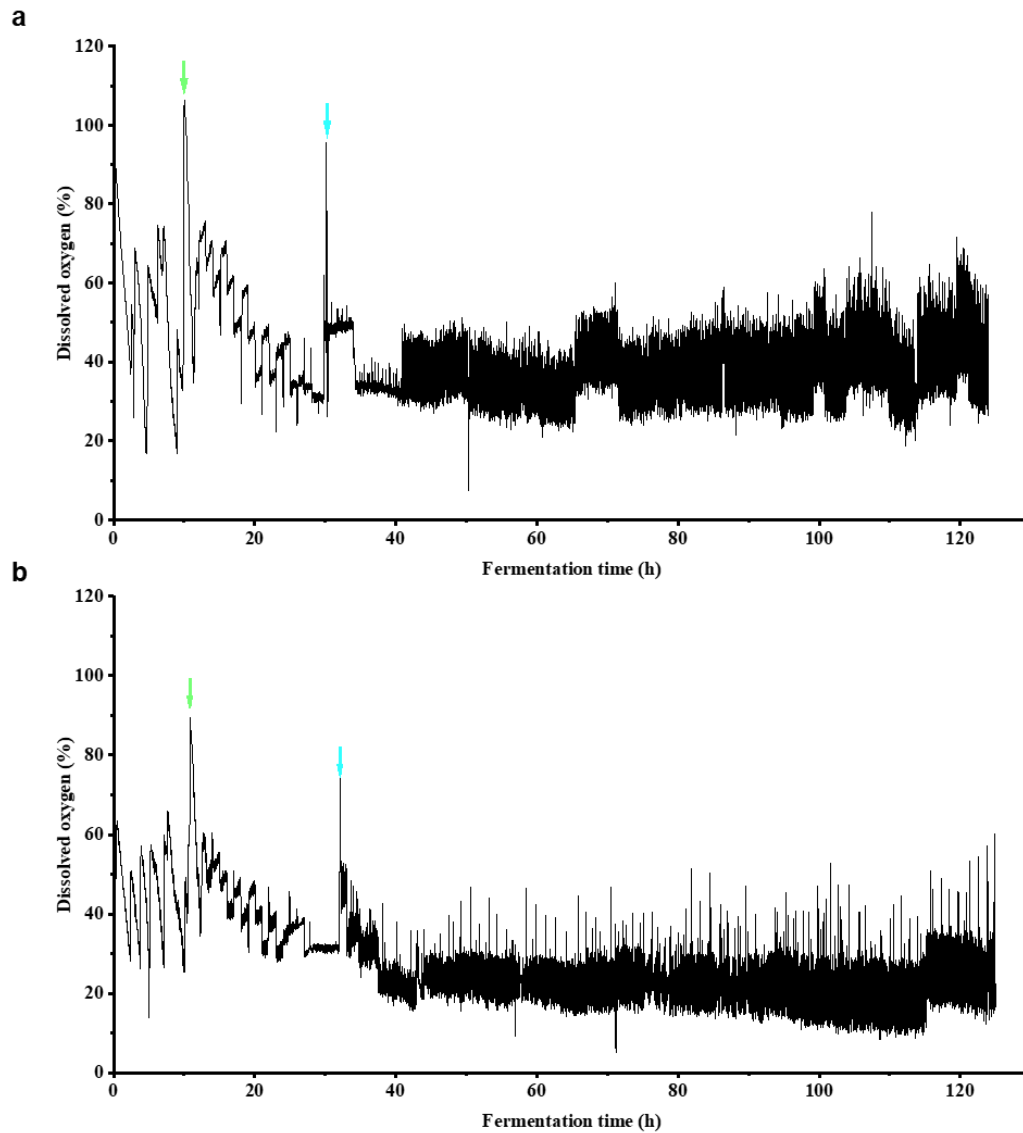

**Supplementary Fig. 17. Dissolved oxygen curves of fed-batch fermentation for YQE729 and YQE734. a YQE729. b YQE734.** The green and blue arrows indicated the start of glucose and ethanol feeding, respectively. Source data are provided as a Source Data file.

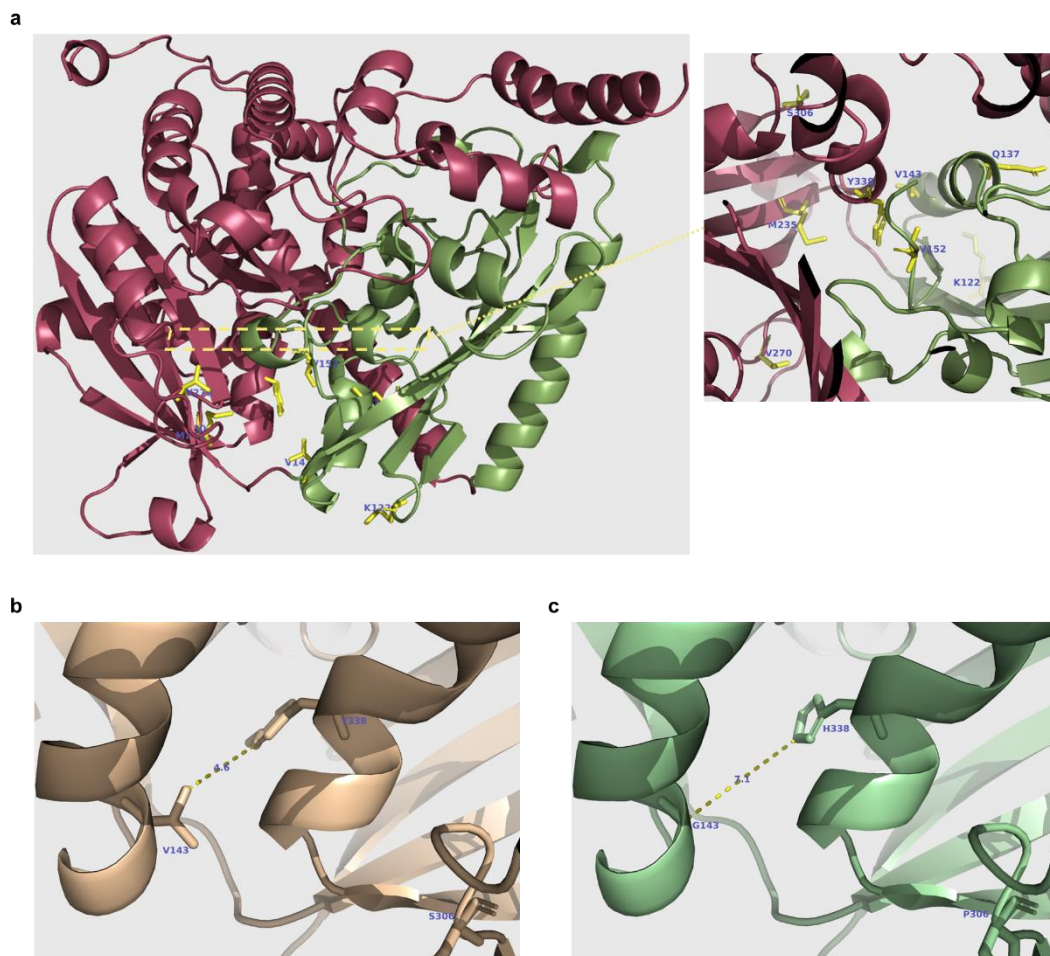

**Supplementary Fig. 18. Molecular mechanisms for improved activity of the evolved ArDWF1 mutants.** **a** Predicted structure of ArDWF1 by AlphaFold2 (<https://colab.research.google.com/github/sokrypton/ColabFold/blob/main/AlphaFold2.ipynb#scrollTo=kOblAo-xetgx>). FAD-binding domain and positive sites (K122, Q137, V143, V152, M235, V270, S306, and Y338) were highlighted in green and yellow, respectively. The residues at 143, 338, and 306 in ArDWF1 **b** and Ar207 **c** were compared.

**Supplementary Table 1. Activity comparison among BL, EBL, and HBL.**

| Species               | Bioassay                           | BL                   | EBL                 | HBL                 | Reference |
|-----------------------|------------------------------------|----------------------|---------------------|---------------------|-----------|
| Bean                  | 1 <sup>st</sup> internode test     | 100                  | 36                  | 33                  | 4         |
|                       | 2 <sup>nd</sup> internode test     | 100                  | 10                  | 0.1                 |           |
| Radish                | Elongation test                    | 100                  | 10                  | 10                  | 5         |
| Tomato                |                                    | 100                  | 10                  | 1                   |           |
| Rice (Arborio)        | Rice-lamina inclination test       | 100                  | 10                  | 100                 | 6         |
| Rice (Bahia)          |                                    | 100                  | 5                   | 5                   | 7         |
| Rice (Tan-            |                                    | 100                  | 10                  | 25                  | 8         |
| Tomato                | Cell-wall-bound Invertase activity | 100<br>(0.2 $\mu$ M) | 79.6<br>(2 $\mu$ M) | 67.6<br>(2 $\mu$ M) | 9         |
|                       | Sucrose uptake                     | 100<br>(0.2 $\mu$ M) | 73.5<br>(2 $\mu$ M) | 71.4<br>(2 $\mu$ M) |           |
| Barberry (Maria)      | Total soluble                      | 100                  | 96.9                | 10                  |           |
|                       | Free amino acids                   | 100                  | 77.6                |                     |           |
| Barberry (Red Rocket) | Total soluble                      | 100                  | 65.4                |                     |           |
|                       | Free amino acids                   | 100                  | 96.8                |                     |           |

**Supplementary Table 2. Mutants obtained from the first round of directed evolution.**

| <b>Mutants</b> | <b>Mutation sites</b> |       |       |       |
|----------------|-----------------------|-------|-------|-------|
| Ar0105         | V143G                 |       |       |       |
| Ar0424         | V152A                 | Q519R |       |       |
| Ar0440         | E61K                  | K122T | V270A | Y338H |
| Ar0527         | S306P                 |       |       |       |
| Ar0528         | M235T                 |       |       |       |
| Ar1322         | Q137R                 |       |       |       |

**Supplementary Table 3. Yeast promoter activity values under different growth conditions.** The data were adapted from Keren *et al.*<sup>11</sup>.

| Strain        | Carbon source            |                         |                         |                          |                         |                         |
|---------------|--------------------------|-------------------------|-------------------------|--------------------------|-------------------------|-------------------------|
|               | Glucose                  |                         |                         | Ethanol                  |                         |                         |
| YQE717        | <i>P<sub>TEF1</sub></i>  | <i>P<sub>TDH3</sub></i> | <i>P<sub>FBA1</sub></i> | <i>P<sub>TEF1</sub></i>  | <i>P<sub>TDH3</sub></i> | <i>P<sub>FBA1</sub></i> |
|               | 2.159565                 | 3.234124                | 1.911226                | 0.430327                 | 0.510003                | 0.212029                |
| YQE717<br>SES | <i>P<sub>TEF1</sub></i>  | <i>P<sub>ADH2</sub></i> | <i>P<sub>FBA1</sub></i> | <i>P<sub>TEF1</sub></i>  | <i>P<sub>ADH2</sub></i> | <i>P<sub>FBA1</sub></i> |
|               | 2.159565                 | 0.028053                | 1.911226                | 0.430327                 | 0.539263                | 0.212029                |
| YQE717<br>SWS | <i>P<sub>TEF1</sub></i>  | <i>P<sub>GAS1</sub></i> | <i>P<sub>FBA1</sub></i> | <i>P<sub>TEF1</sub></i>  | <i>P<sub>GAS1</sub></i> | <i>P<sub>FBA1</sub></i> |
|               | 2.159565                 | 1.069321                | 1.911226                | 0.430327                 | 0.205553                | 0.212029                |
| YQE717<br>EEE | <i>P<sub>JEN1</sub></i>  | <i>P<sub>ICL1</sub></i> | <i>P<sub>ADH2</sub></i> | <i>P<sub>JEN1</sub></i>  | <i>P<sub>ICL1</sub></i> | <i>P<sub>ADH2</sub></i> |
|               | 0.012039                 | 0.0115                  | 0.028053                | 0.817225                 | 0.706364                | 0.539263                |
| YQE717<br>ESE | <i>P<sub>JEN1</sub></i>  | <i>P<sub>TEF1</sub></i> | <i>P<sub>ADH2</sub></i> | <i>P<sub>JEN1</sub></i>  | <i>P<sub>TEF1</sub></i> | <i>P<sub>ADH2</sub></i> |
|               | 0.012039                 | 2.159565                | 0.028053                | 0.817225                 | 0.430327                | 0.539263                |
| YQE717<br>WWW | <i>P<sub>RPL25</sub></i> | <i>P<sub>RPS3</sub></i> | <i>P<sub>GAS1</sub></i> | <i>P<sub>RPL25</sub></i> | <i>P<sub>RPS3</sub></i> | <i>P<sub>GAS1</sub></i> |
|               | 1.077                    | 1.067463                | 1.069321                | 0.178034                 | 0.175343                | 0.205553                |
| YQE717<br>WSW | <i>P<sub>RPL25</sub></i> | <i>P<sub>TEF1</sub></i> | <i>P<sub>GAS1</sub></i> | <i>P<sub>RPL25</sub></i> | <i>P<sub>TEF1</sub></i> | <i>P<sub>GAS1</sub></i> |
|               | 1.077                    | 2.159565                | 1.069321                | 0.178034                 | 0.430327                | 0.205553                |

## Supplementary references

- 1 Wei, Z. Y. & Li, J. Brassinosteroids regulate root growth, development, and symbiosis. *Mol Plant* **9**, 86-100 (2016).
- 2 Takahashi, T., Gasch, A., Nishizawa, N. & Chua, N. H. The *DIMINUTO* gene of *Arabidopsis* is involved in regulating cell elongation *Gene Dev* **9**, 97-107 (1995).
- 3 Tsukagoshi, Y. *et al.* *Ajuga*  $\Delta$ 24-sterol reductase catalyzes the direct reductive conversion of 24-methylenecholesterol to campesterol. *J Biol Chem* **291**, 8189-8198 (2016).
- 4 Thompson, M. J. *et al.* Synthesis of brassinosteroids and relationship of structure to plant growth-promoting effects. *Steroids* **39**, 89-105 (1982).
- 5 Takatsuto, S. *et al.* Structure activity relationship of brassinosteroids. *Phytochemistry* **22**, 2437-2441 (1983).
- 6 Takatsuto, S., Yazawa, N., Ikekawa, N., Morishita, T. & Abe, H. Synthesis of (24R)-28-homobrassinolide analogs and structure activity relationships of brassinosteroids in the rice-lamina inclination test. *Phytochemistry* **22**, 1393-1397 (1983).
- 7 Brosa, C. Biological effects of brassinosteroids. *Crit Rev Biochem Mol* **34**, 339-358 (1999).
- 8 Fujioka, S., Noguchi, T., Takatsuto, S. & Yoshida, S. Activity of brassinosteroids in the dwarf rice lamina inclination bioassay. *Phytochemistry* **49**, 1841-1848 (1998).
- 9 Goetz, M., Godt, D. E. & Roitsch, T. Tissue-specific induction of the mRNA for an extracellular invertase isoenzyme of tomato by brassinosteroids suggests a role for steroid hormones in assimilate partitioning. *Plant J* **22**, 515-522 (2000).
- 10 Pacholczak, A., Zajaczkowska, M. & Nowakowska, K. The effect of brassinosteroids on rooting of stem cuttings in two barberry (*Berberis thunbergii* L.) cultivars. *Agronomy-Basel* **11** (2021).
- 11 Keren, L. *et al.* Promoters maintain their relative activity levels under different growth conditions. *Mol. Syst. Biol.* **9**, 17 (2013).
